# Supplementary material for: Synthesis of nanostructured catalysts by surfactant-templating of large-pore zeolites
Source: Royal Society of Chemistry journal article supplement (doi:10.1039/c9na00004f), 2019-01-01
Supplement: c9na00004f1.pdf [file c9na00004f1.pdf]

1  
2  
3  
4  
5  
6  
7  
8  
9  
10  
11  
12  
13  
14  
15  
16  
17  
18  
19  
20  
21  
22  
23  
24  
25  
26  
27  
28

## Electronic Supplementary Information

### **Synthesis of Nanostructured Catalysts by Surfactant-Templating of Large-Pore Zeolites**

*Aqeel Al-Ani<sup>a,b\*</sup>, Josiah J. C. Haslam<sup>a</sup>, Natalie E. Mordvinova<sup>c</sup>, Oleg I. Lebedev<sup>c</sup>, Aurélie Vicente<sup>d</sup>, Christian Fernandez<sup>d</sup> and Vladimir Zholobenko<sup>a\*</sup>*

*<sup>a</sup> School of Chemical and Physical Sciences, Keele University, Keele, Staffordshire, ST5 5BG, United Kingdom*

*<sup>b</sup> Oil Marketing Company (SOMO), Baghdad, Iraq*

*<sup>c</sup> Laboratoire CRISMAT ENSICAEN UMR CNRS 6508, 6 Boulevard du Maréchal Juin, 14050, Caen Cedex 04, France*

*<sup>d</sup> Normandie Univ, ENSICAEN, UNICAEN, CNRS, Laboratoire Catalyse et Spectrochimie, 14000 Caen, France*

\* Corresponding authors:

Aqeel Al-Ani, e-mail address: a.a.t.al-ani@keele.ac.uk

V. Zholobenko, e-mail address: v.l.zholobenko@keele.ac.uk

## 30 Experimental section

31 The catalytic studies, utilising 1,3,5-tri-isopropylbenzene (TIPB) dealkylation as a reaction test (Ref.  
32 S1), were carried out in a conventionally heated high-pressure reaction system, Monowave-50  
33 supplied by Anton Paar, using specially designed 10-ml glass vials as batch reactors operating at  
34 elevated temperature and pressures (up to 250°C and 20 bar).

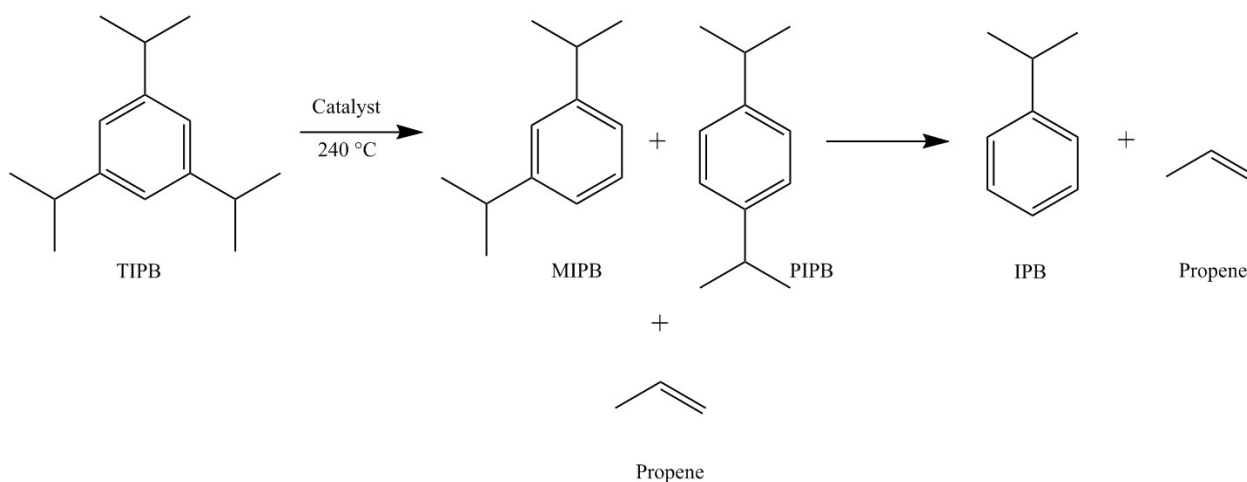

35

36 0.2 g of the zeolite catalyst was activated in an open reactor at 400°C for 5 h, cooled down to  
37 ~100°C and then mixed with 2 mL of TIPB. The reactor was purged with nitrogen and sealed, the  
38 temperature was raised to 240°C (the temperature ramp was ~ 40 °C/min) and kept for 1 h. Next, the  
39 reaction mixture was cooled down to ~0°C and the liquid products were isolated and identified using  
40 an Agilent 7890A GC with the 5975C mass detection system equipped with a capillary column  
41 BPX90 SGE, 15m×0.25mm×0.25µm (1 % solution of the products in MTBE with 0.1 v% of nonane  
42 as the internal standard).

43

**Table S1. GC-MS analysis conditions.**

|                                   |                                                                |
|-----------------------------------|----------------------------------------------------------------|
| Split ratio                       | 100                                                            |
| Carrier gas                       | Helium at 1 ml/min                                             |
| Column temperature                | 50°C for 3 min<br>25°C/min to 300°C<br>Hold at 300°C for 2 min |
| Injector and detector temperature | 250°C                                                          |
| Injection volume                  | 0.2 µL                                                         |

44

45 (S ) Qin, Z.; Cychosz, K.A.; Melinte, G.; El Siblani, H.; Gilson, J-P.; Thommes, M.; Fernandez, C.;  
46 Mintova, S.; Ersen, O.; Valtchev, V. Opening the Cages of Faujasite-Type Zeolite. *J Am Chem Soc*,  
47 **2017**,139,17273-17276.

48

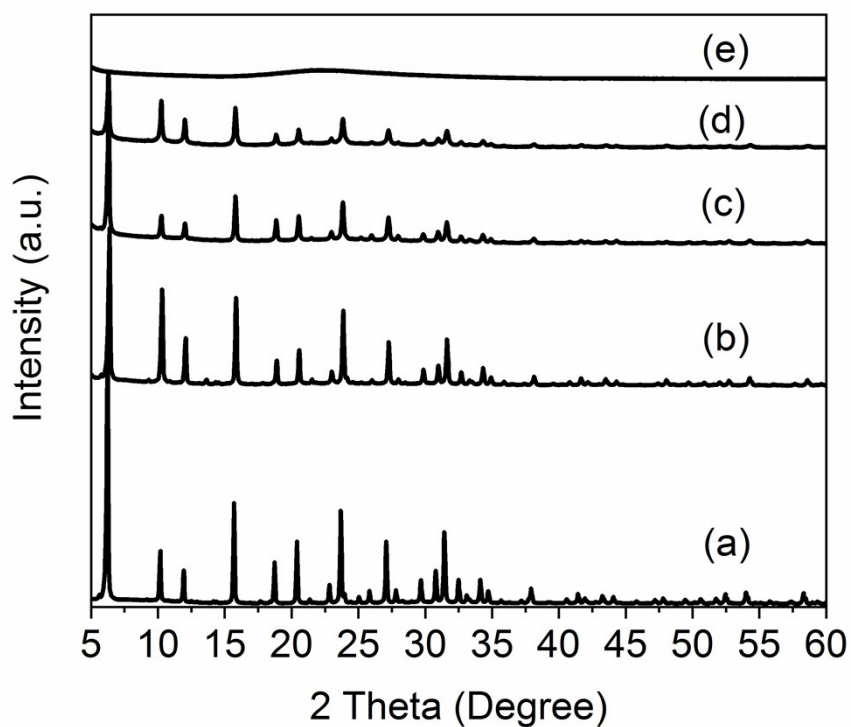

49

50 **Figure S1.** XRD patterns of faujasite-type zeolites treated with different amount of citric acid (a) 0  
51 meq, (b) 4.5 meq, (c) 6 meq, (d) 9 meq and (e) 12 meq.

52 (a)

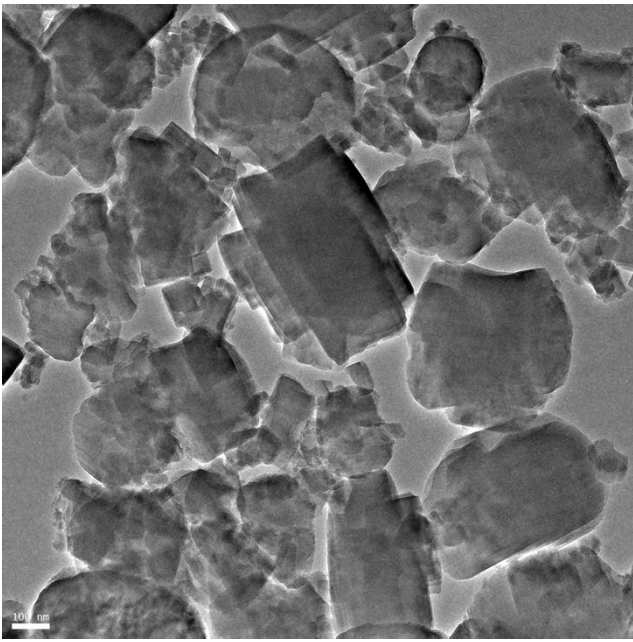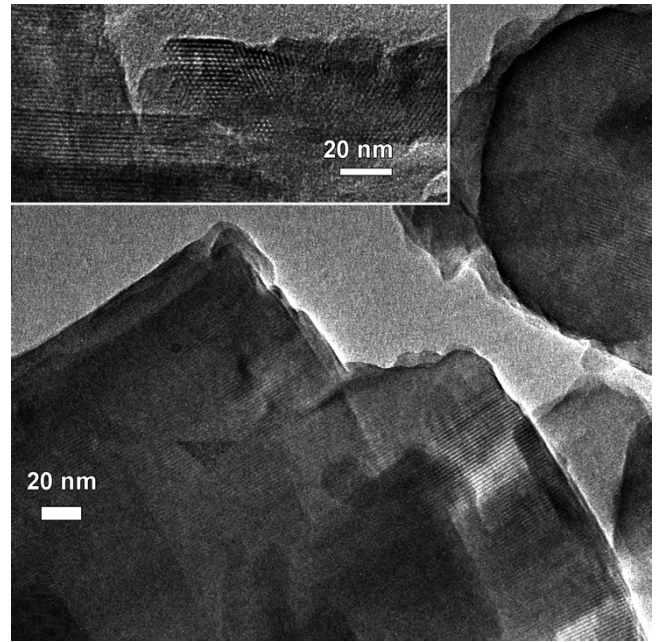

53

(b)

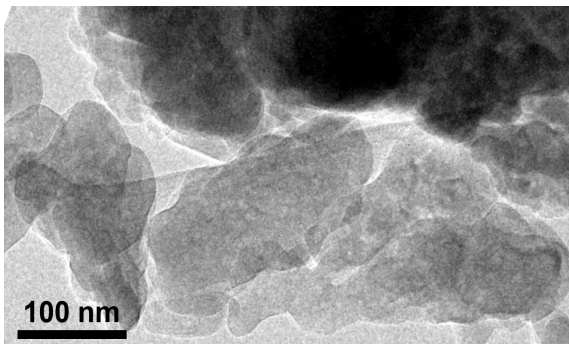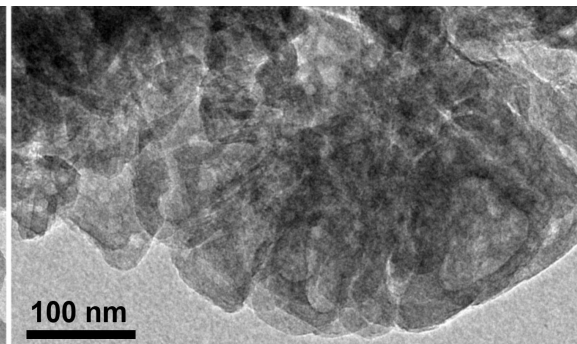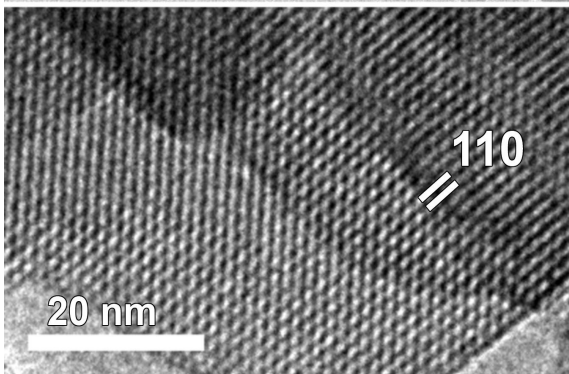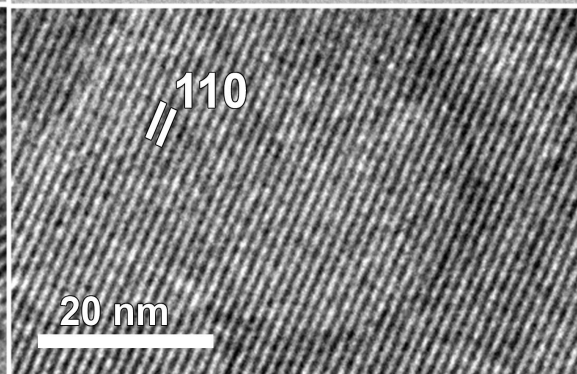

54

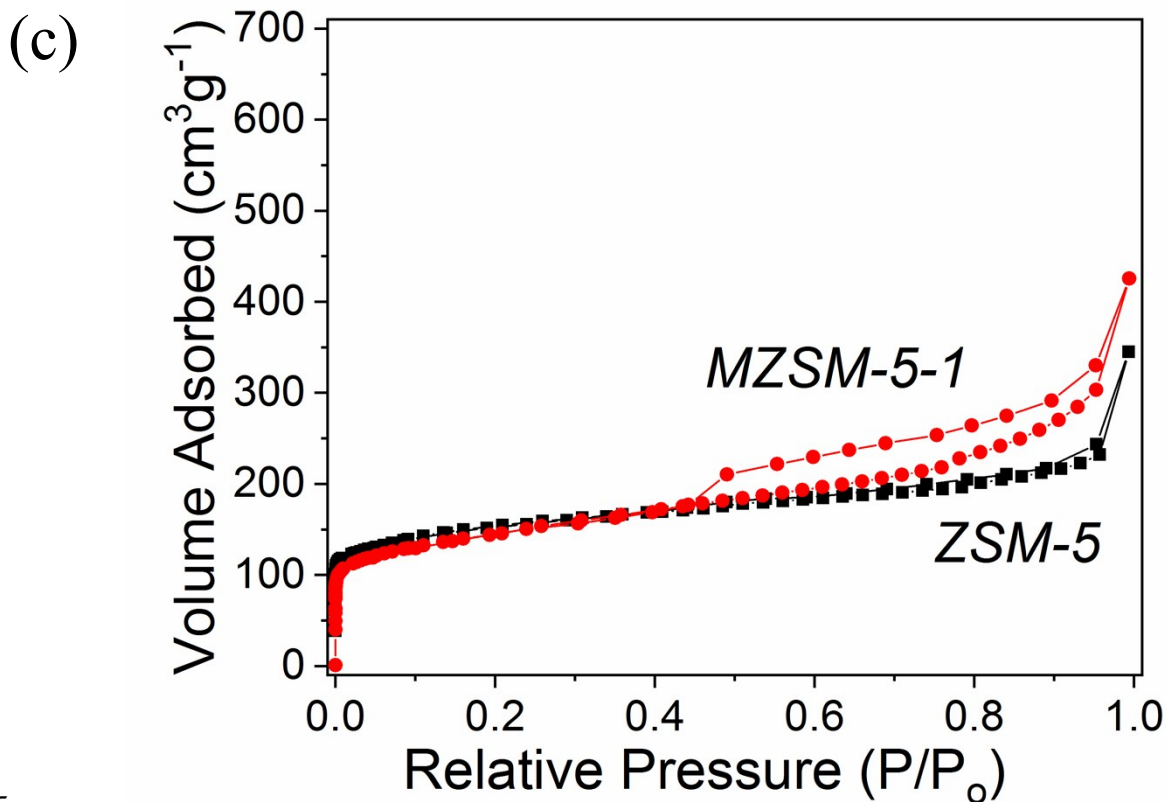

55

56 **Figure S2.** (a) Bright field TEM images for the parent LTL zeolite; (b) TEM images of the parent  
 57 ZSM-5 (left) and mesostructured MZSM-5-1 (right); (c)  $\text{N}_2$  adsorption and desorption isotherms for  
 58 parent and modified ZSM-5 zeolites.

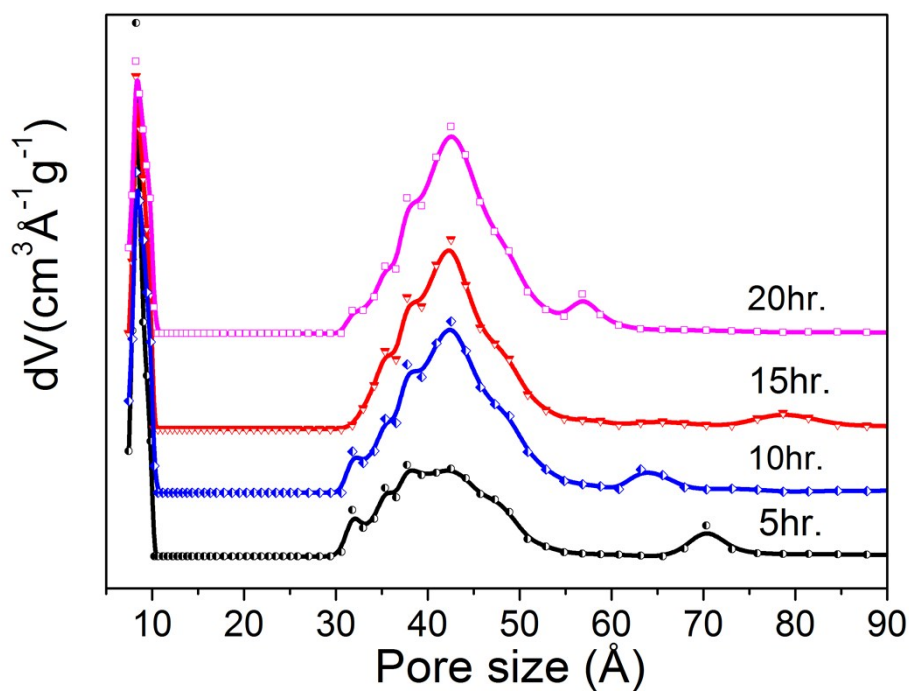

59

60

**Figure S3.** Pore size distribution of treated MOR at different times.

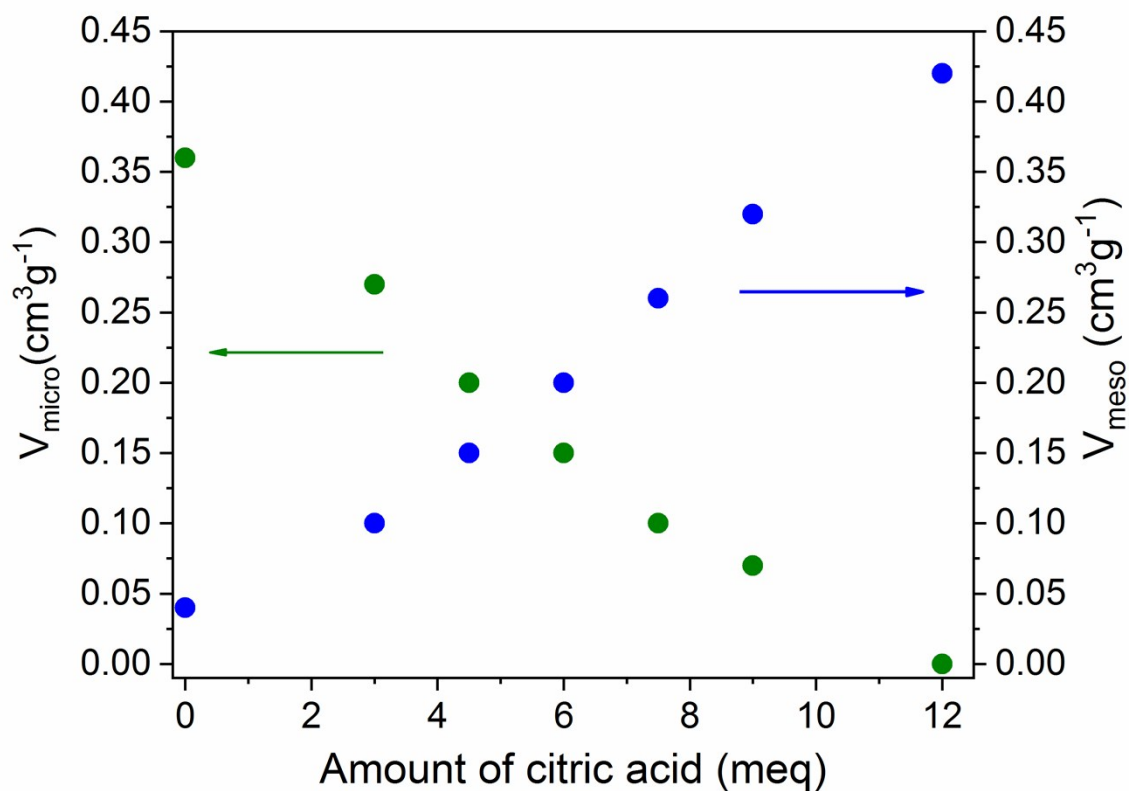

61  
 62 **Figure S4.** The relationship between the amount of citric acid added and the pore volume of  
 63 modified faujasite-type zeolite.

64

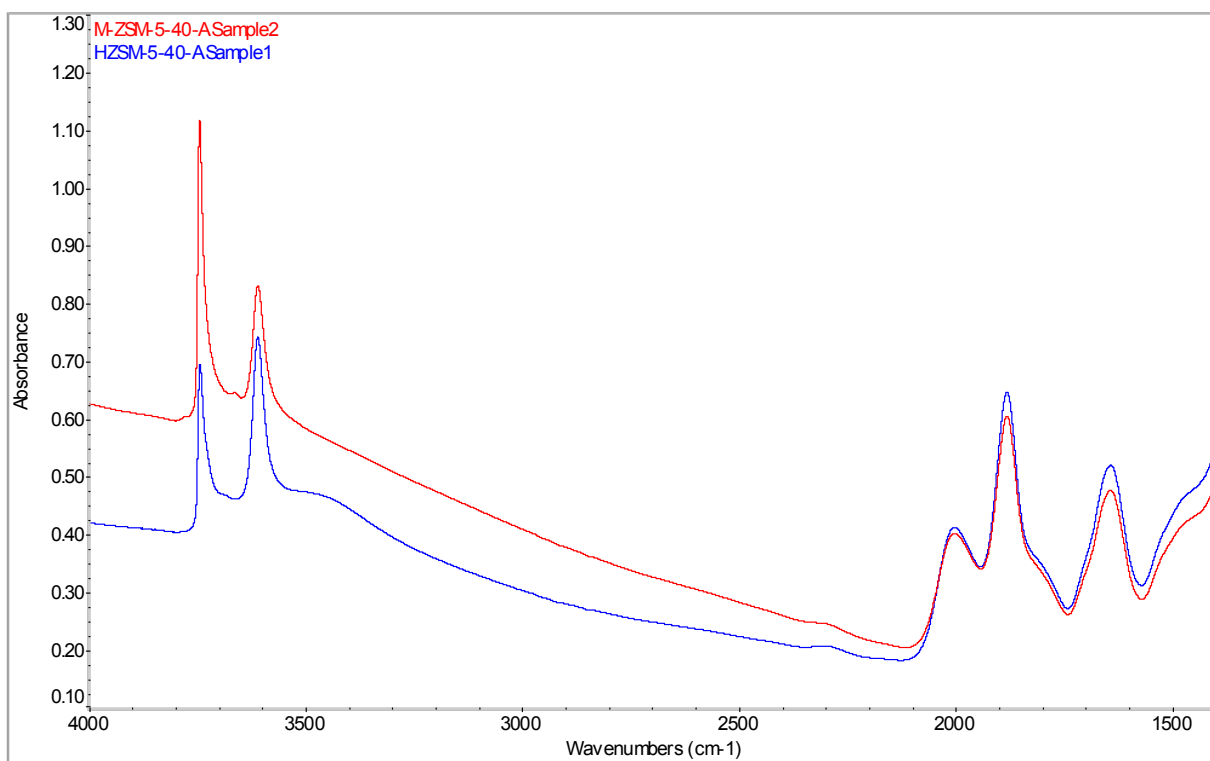

65  
 66 **Figure S5a.** FTIR spectra of the O-H region of the parent (blue) and mesostructured (red) ZSM-5.

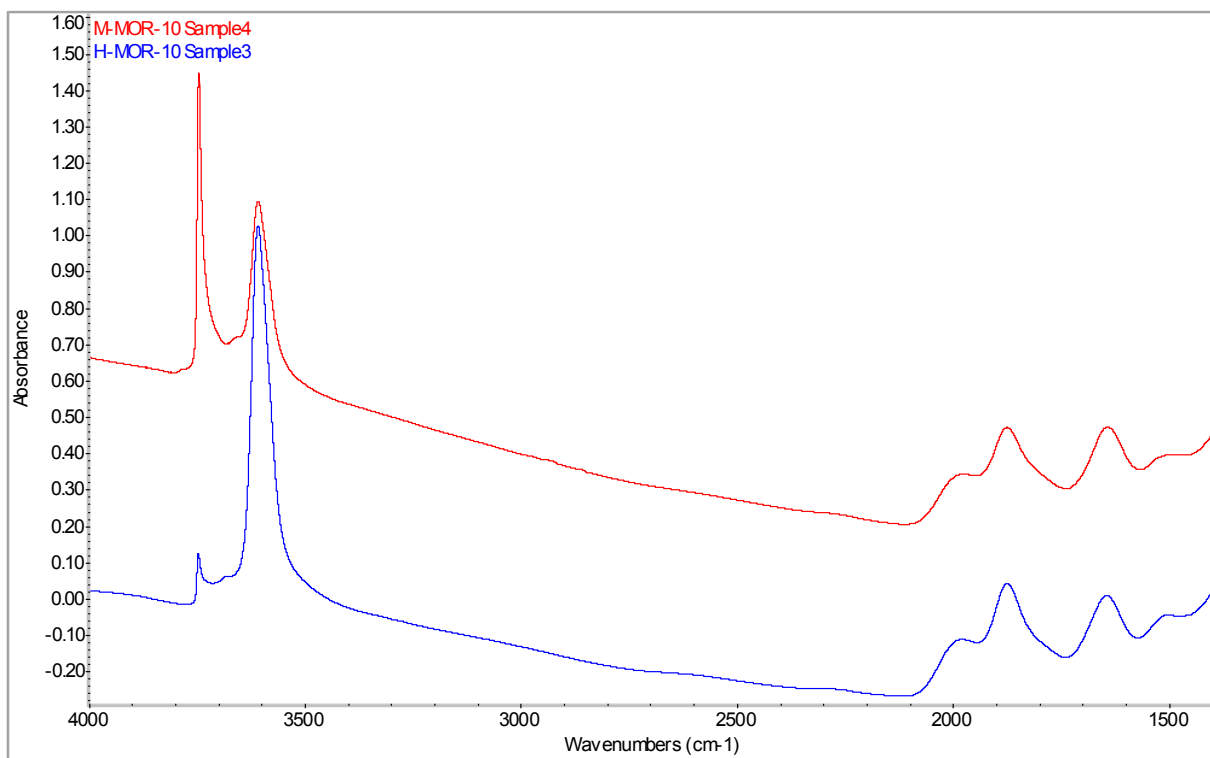

67  
 68 **Figure S5b.** FTIR spectra of the O-H region of the **parent (blue)** and **mesostructured (red)** MOR.

69

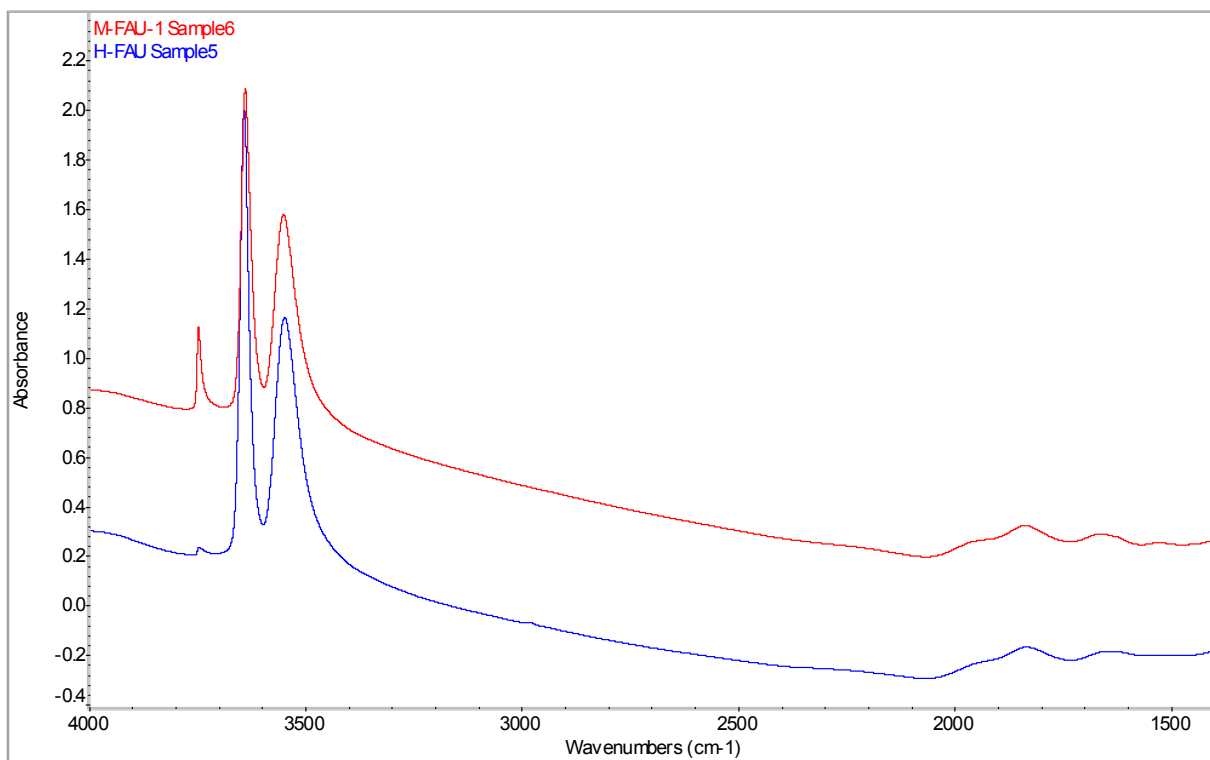

70  
 71 **Figure S5c.** FTIR spectra of the O-H region of the **parent (blue)** and **mesostructured (red)** FAU.

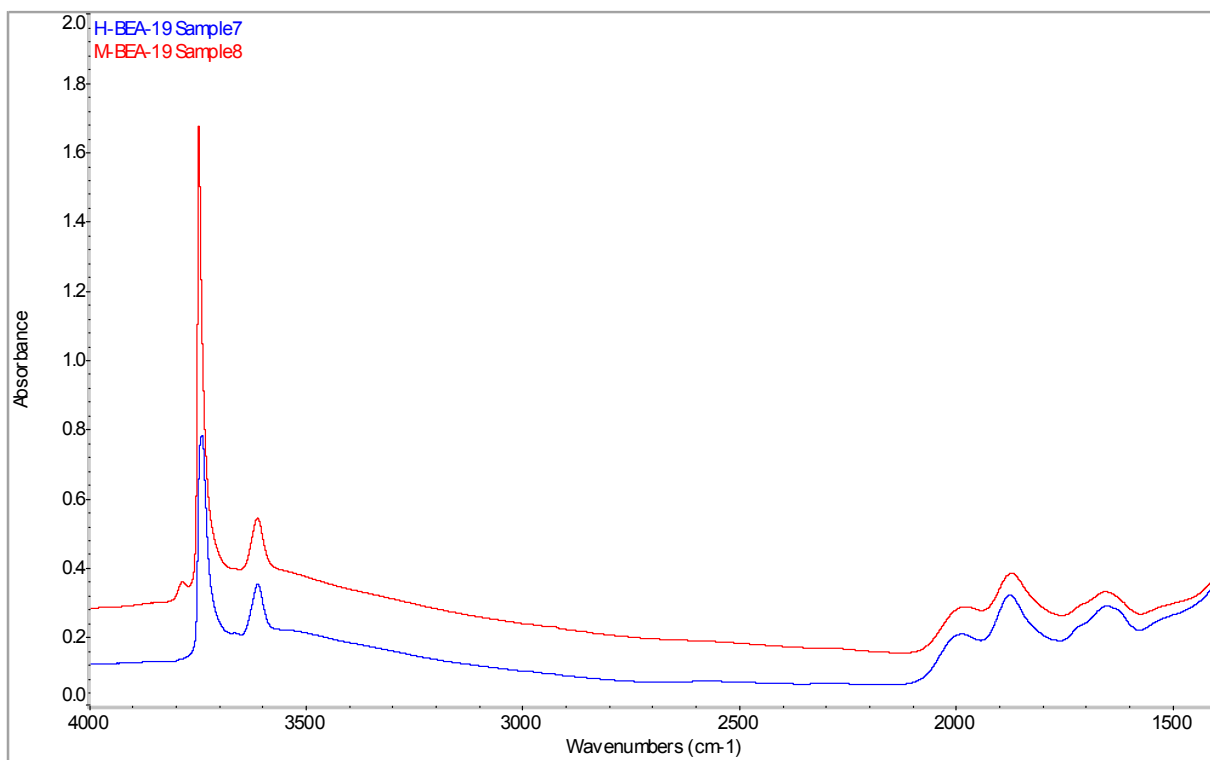

72  
 73 **Figure S5d.** FTIR spectra of the O-H region of the **parent (blue)** and **mesostructured (red)** BEA.

74

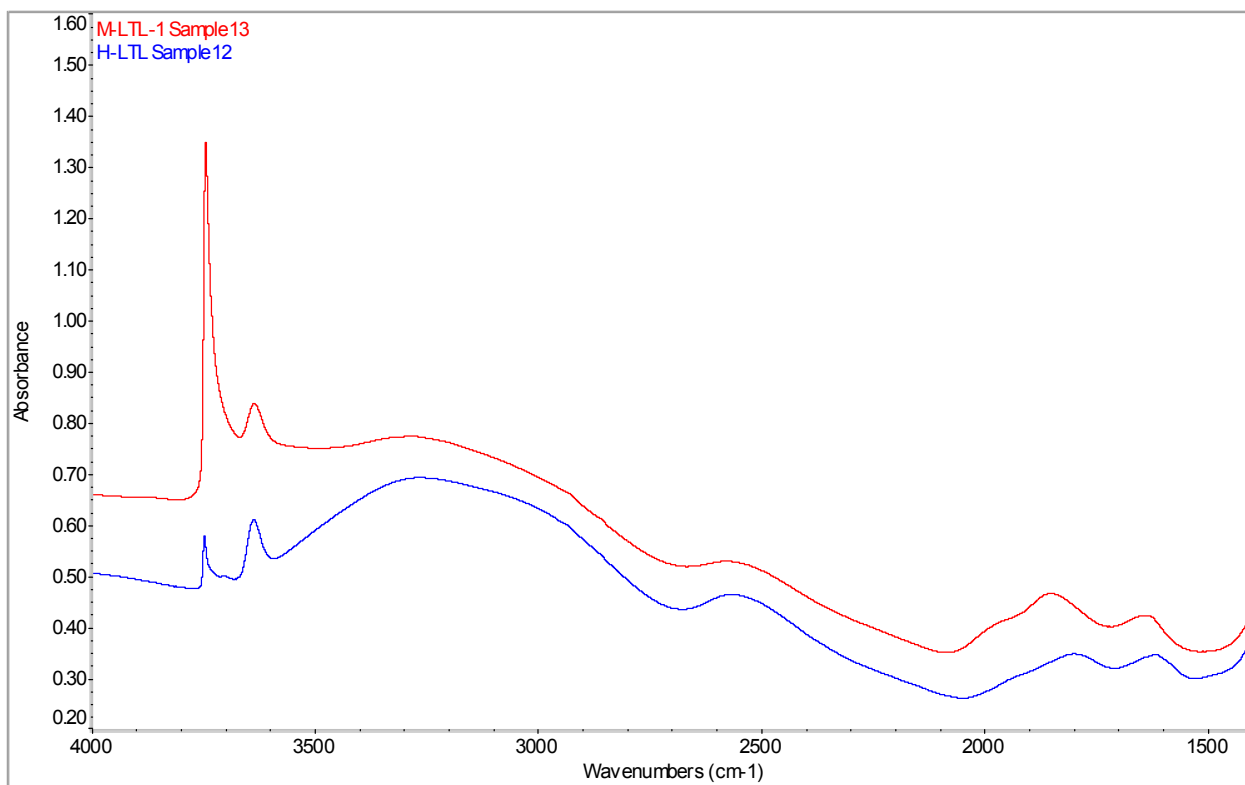

75  
 76 **Figure S5e.** FTIR spectra of the O-H region of the **parent (blue)** and **mesostructured (red)** LTL. All  
 77 sets of FTIR spectra are offset for clarity.

78



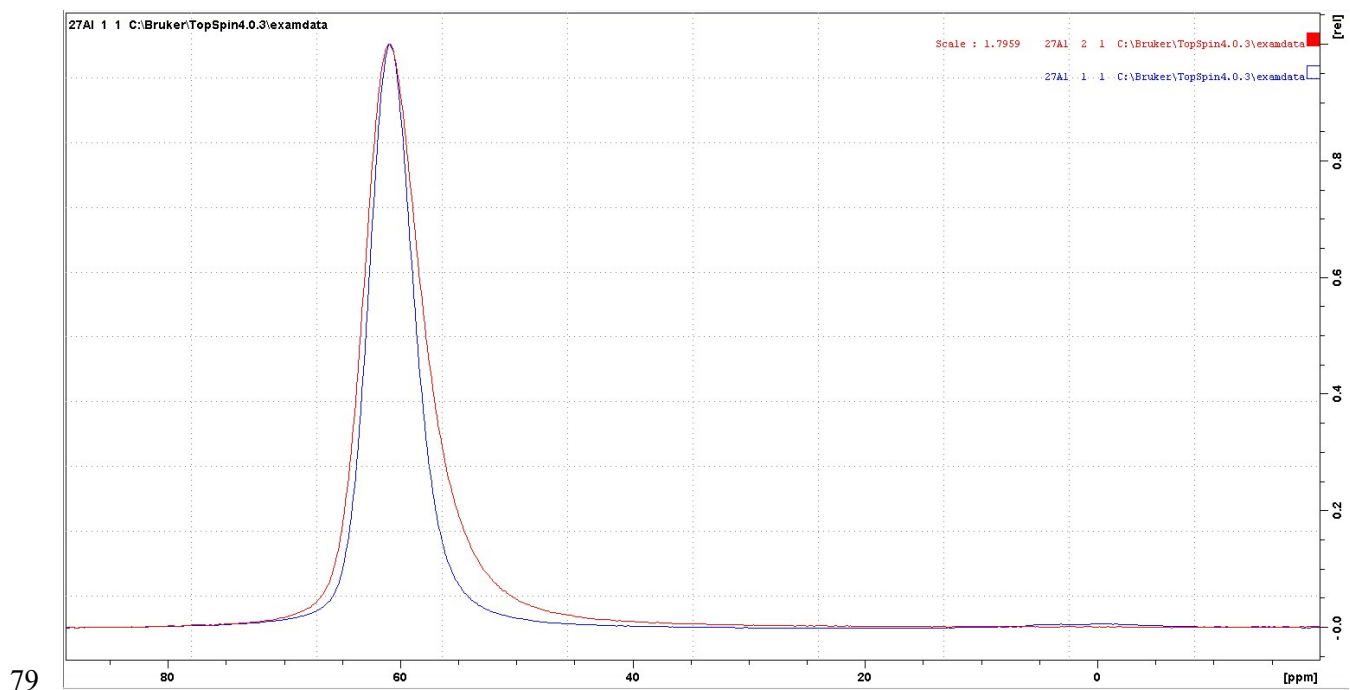

80 **Figure S6a.**  $^{27}\text{Al}$  MAS NMR spectra (normalised to the same peak intensity) of the **parent (blue)**  
81 and **hierarchical (red)** FAU.

82

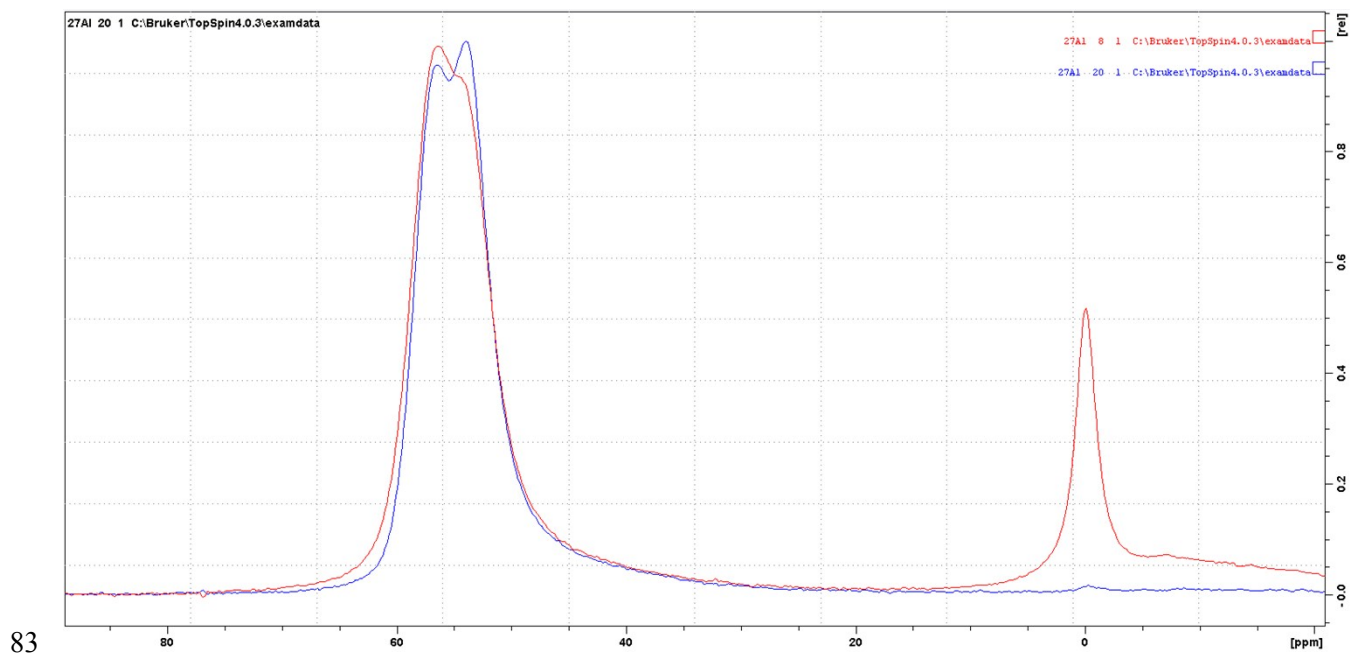

84 **Figure S6b.**  $^{27}\text{Al}$  MAS NMR spectra (normalised to the same peak intensity) of the **parent (blue)**  
85 and **hierarchical (red)** BEA.

86

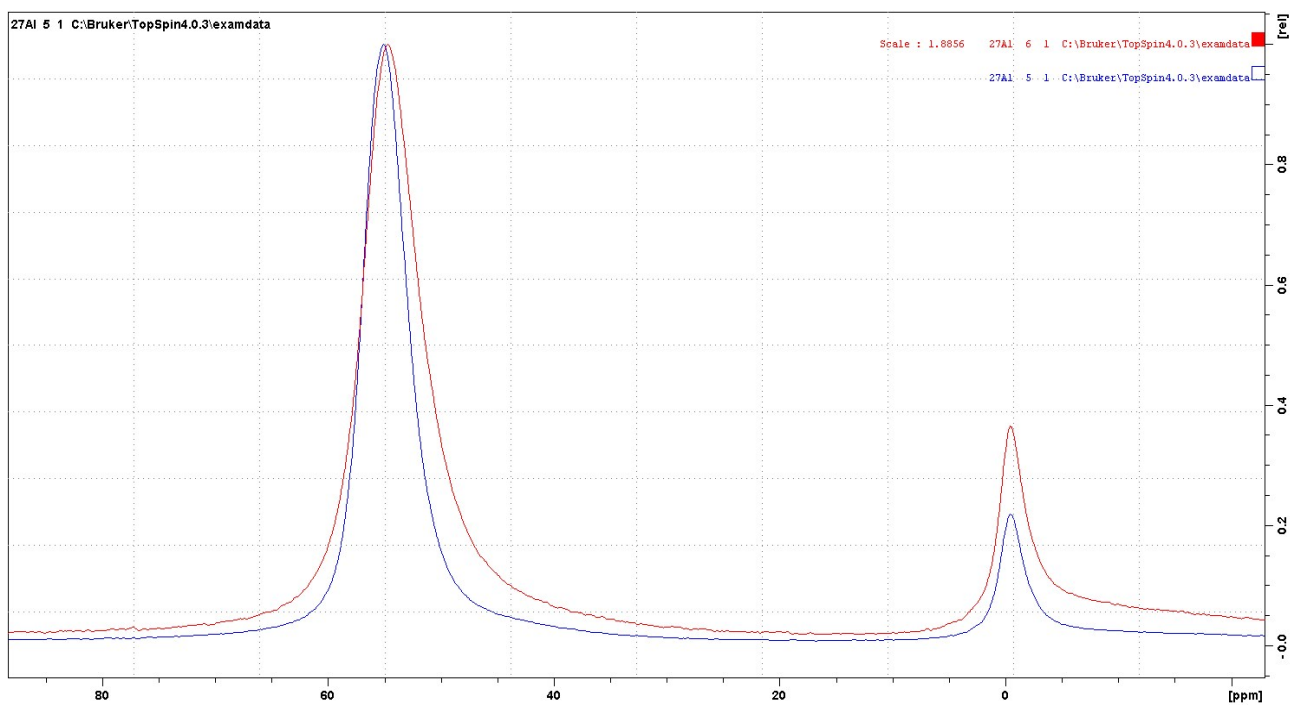

87

88 **Figure S6c.**  $^{27}\text{Al}$  MAS NMR spectra (normalised to the same peak intensity) of the **parent (blue)**  
 89 **and hierarchical (red)** MOR.

90

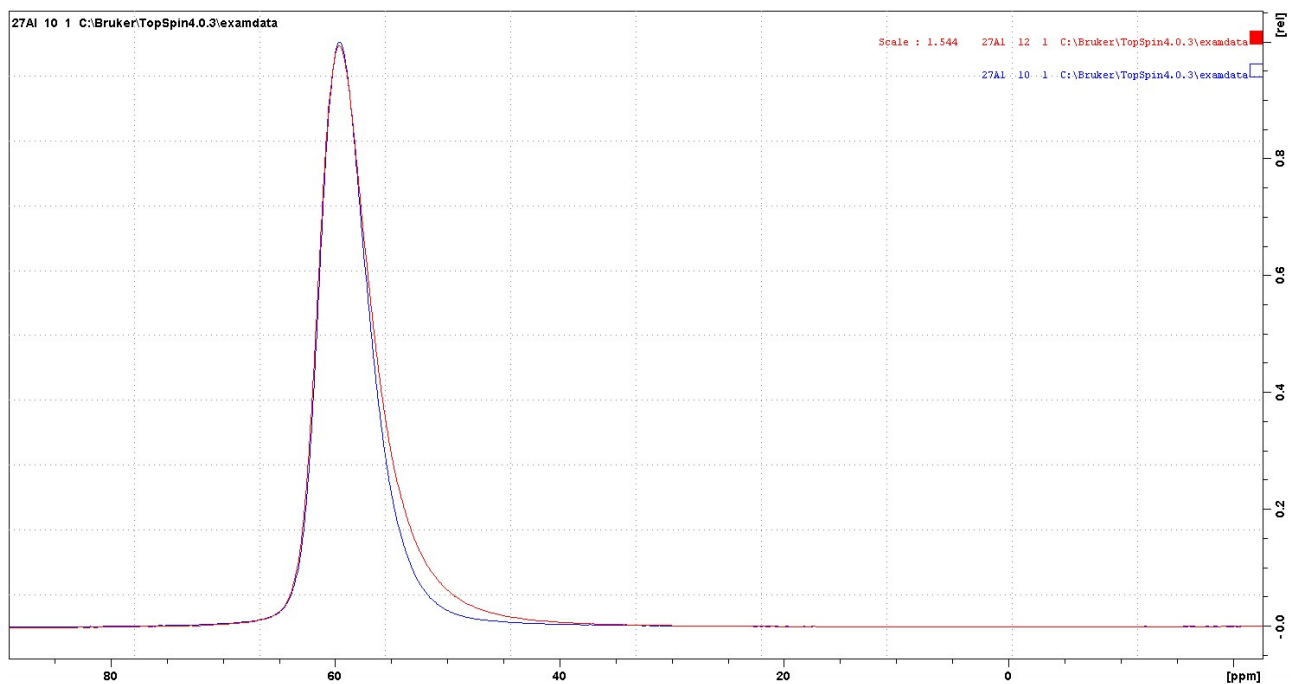

91

92 **Figure S6d.**  $^{27}\text{Al}$  MAS NMR spectra (normalised to the same peak intensity) of the **parent (blue)**  
 93 **and hierarchical (red)** LTL.

94

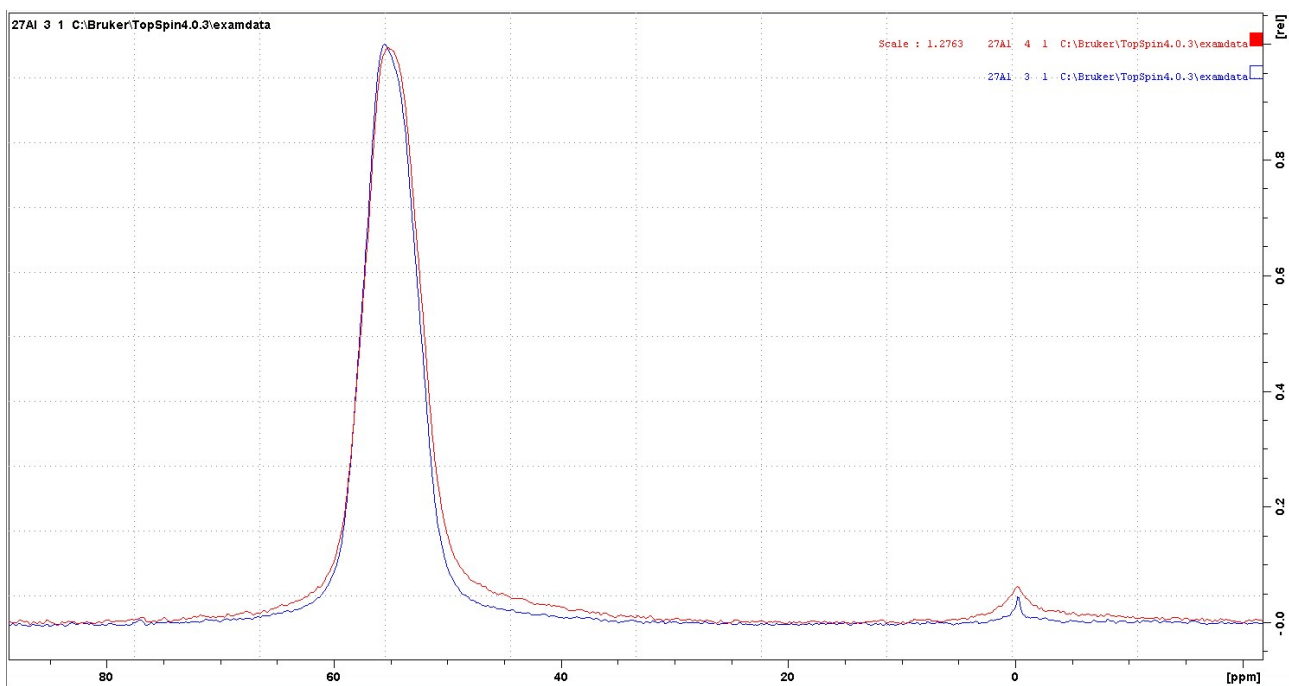

95  
 96 **Figure S6e.**  $^{27}\text{Al}$  MAS NMR spectra (normalised to the same peak intensity) of the **parent** (blue)  
 97 and **hierarchical** (red) ZSM-5.

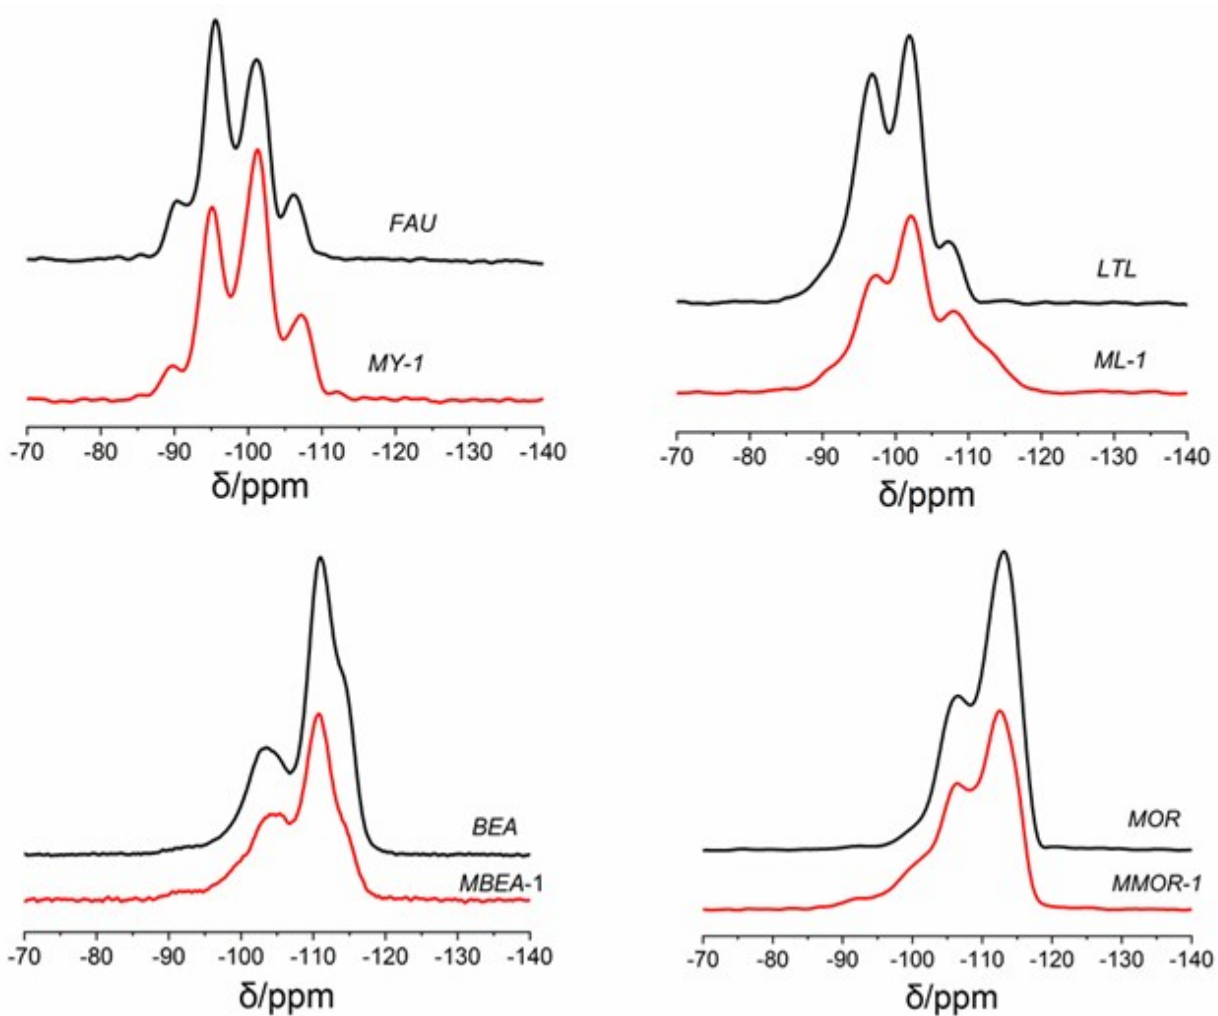

98

99

100 **Figure S7.** <sup>29</sup> Si MAS NMR spectra of the parent and hierarchical zeolites.

101

102 **Table S2. Reaction test data: product selectivities (mol%) and conversion.**

|           | IPB | MIPB | PIPB | TIPB | Conversion, % |
|-----------|-----|------|------|------|---------------|
| NH4-Y     | 3%  | 21%  | 11%  | 65%  | 35%           |
| MY-1      | 6%  | 28%  | 19%  | 46%  | 54%           |
| NH4-BEA   |     | 8%   | 4%   | 88%  | 12%           |
| MBEA-1    |     | 11%  | 6%   | 83%  | 17%           |
| NH4-ZSM-5 |     | 2%   | 0%   | 98%  | 2%            |
| MZSM-5-1  |     | 6%   | 0%   | 94%  | 6%            |
| NH4-MOR   |     | 2%   | 0%   | 98%  | 2%            |
| MMOR-1    |     | 7%   | 3%   | 91%  | 9%            |
| NH4-L     |     | 1%   | 0%   | 99%  | 1%            |
| ML-1      |     | 10%  | 3%   | 87%  | 13%           |

103 TIPB - 1,3,5-tri-isopropylbenzene

104 IPB - mono-isopropylbenzene

105 MIPB - 1,3- and for all the studied catalysts, and a small amount of

106 PIPB - 1,4-di-isopropylbenzenes
